# Supplementary material
Source: PubMed Central journal article supplement (PMC3188694)
Supplement: NIHMS324918-supplement-1_si_001.pdf [file NIHMS324918-supplement-1_si_001.pdf]

# Bisphosphonamidate Clodronate Prodrug Exhibits Potent Anticancer Activity in Non-Small Cell Lung Cancer cells.

*Marie R. Webster<sup>1</sup>, Ming Zhao<sup>2</sup>, Michelle A. Rudek<sup>2</sup>, Christine L. Hann<sup>3</sup>, Caren L. Freel Meyers<sup>1</sup>, \**

<sup>1</sup>Department of Pharmacology and Molecular Sciences, Johns Hopkins University School of Medicine, Baltimore, Maryland; <sup>2</sup>Analytical Pharmacology Core of the Sidney Kimmel Comprehensive Cancer Center at Johns Hopkins University School of Medicine, Baltimore, MD; <sup>3</sup>Department of Oncology, Johns Hopkins University School of Medicine, Baltimore, Maryland.

\* [cmeyers@jhmi.edu](mailto:cmeyers@jhmi.edu)

## Supporting Information

### Table of Contents:

#### Characterization of **14**:

|                                        |   |
|----------------------------------------|---|
| <sup>1</sup> H NMR of <b>14</b> .....  | 2 |
| <sup>31</sup> P NMR of <b>14</b> ..... | 2 |
| HPLC of <b>14</b> .....                | 3 |

#### Characterization of **15**:

|                                        |   |
|----------------------------------------|---|
| <sup>1</sup> H NMR of <b>15</b> .....  | 4 |
| <sup>31</sup> P NMR of <b>15</b> ..... | 4 |
| HPLC of <b>15</b> .....                | 5 |

|                                      |   |
|--------------------------------------|---|
| Stability of Prodrugs in Media ..... | 6 |
|--------------------------------------|---|

|                                                  |   |
|--------------------------------------------------|---|
| Reaction of prodrug <b>14</b> with MTBSTFA ..... | 7 |
|--------------------------------------------------|---|

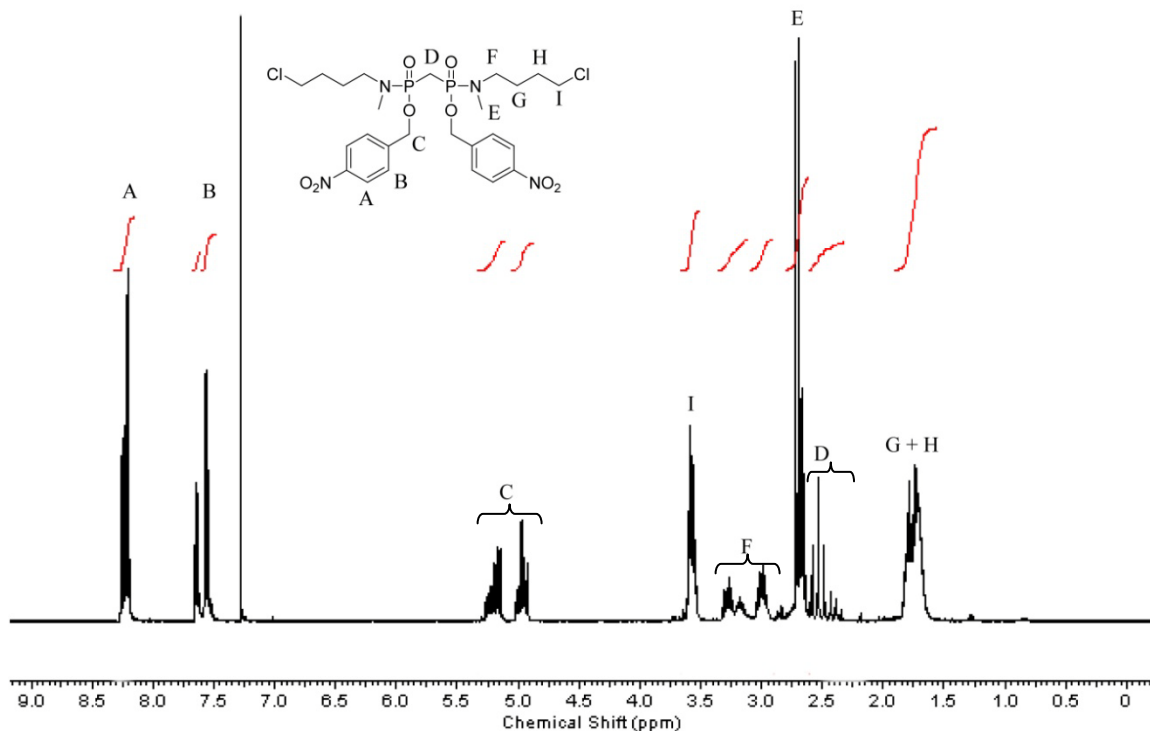

**Figure S1.**  $^1\text{H}$  NMR spectrum of prodrug **14** acquired in  $\text{CDCl}_3$  on a 400 MHz Bruker NMR. Chemical shifts are reported in the accompanying publication (Experimental Procedures).

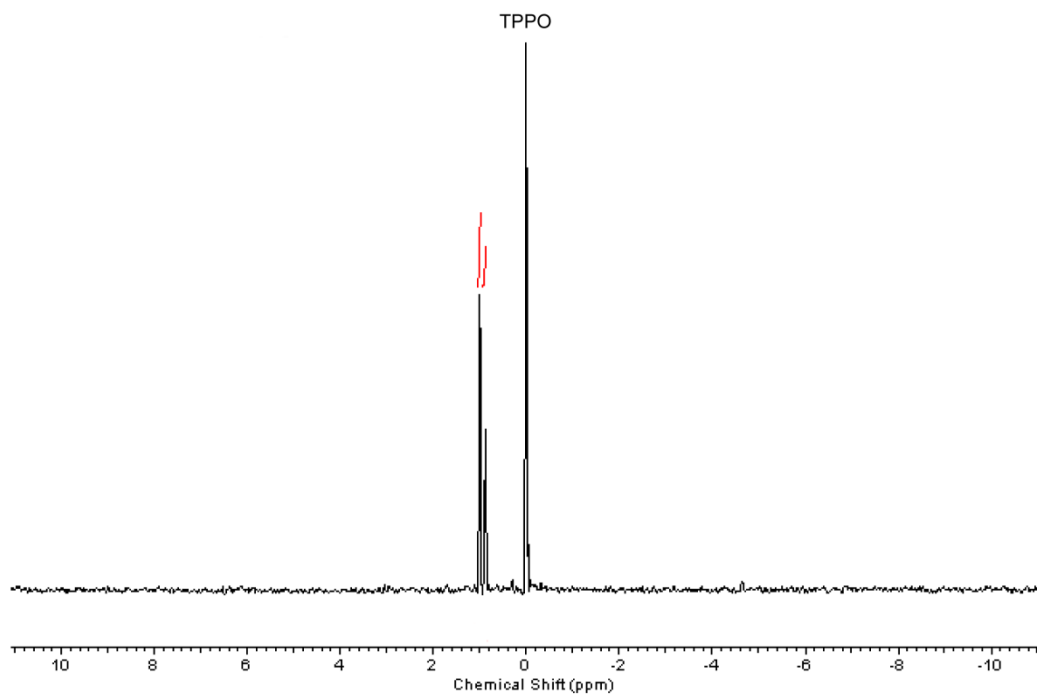

**Figure S2.**  $^{31}\text{P}$  NMR spectrum of prodrug **14** acquired in  $\text{CDCl}_3$  on a 400 MHz Bruker NMR, using TPPO as an external standard. Chemical shifts are reported in the accompanying publication (Experimental Procedures).

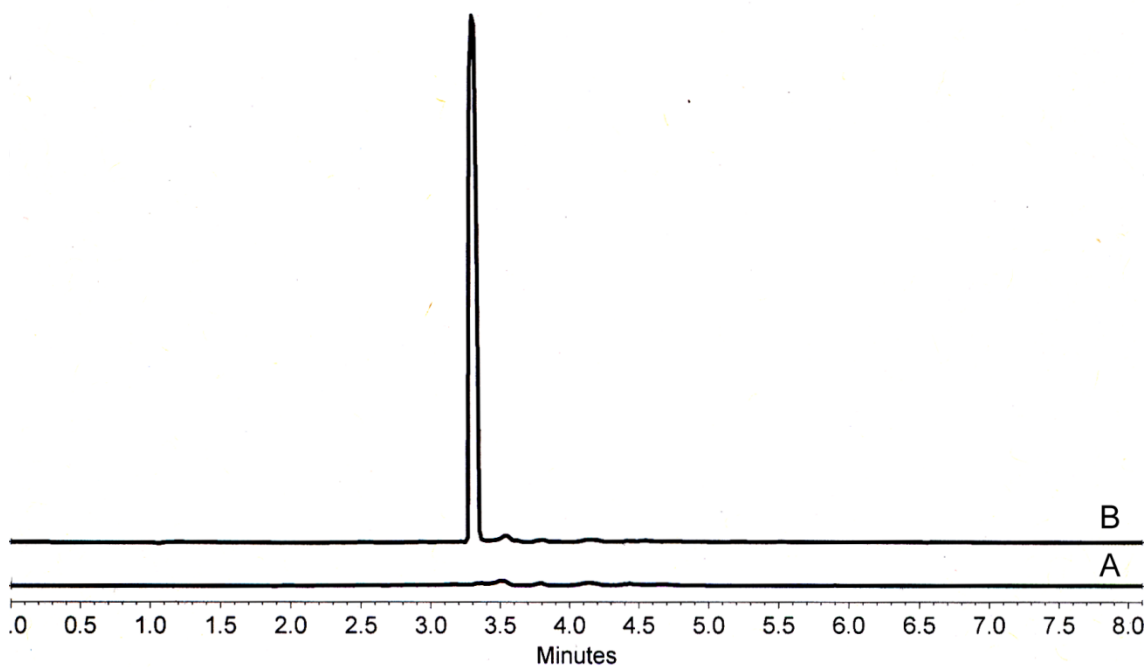

**Figure S3.** Purity of bisphosphonate prodrug **14** is > 95% as determined by reversed-phase HPLC, using a C<sub>18</sub> Rocket<sup>TM</sup> column. Method: 100% water to 100% acetonitrile, over 3 min, then 5 min at 100% acetonitrile. Retention time = 3.3 min. Detected at  $\lambda_{\text{max}}$  of 270 nm. Minor peaks observed in the chromatogram of **14** (B) are artifacts detected in the background chromatogram (A).

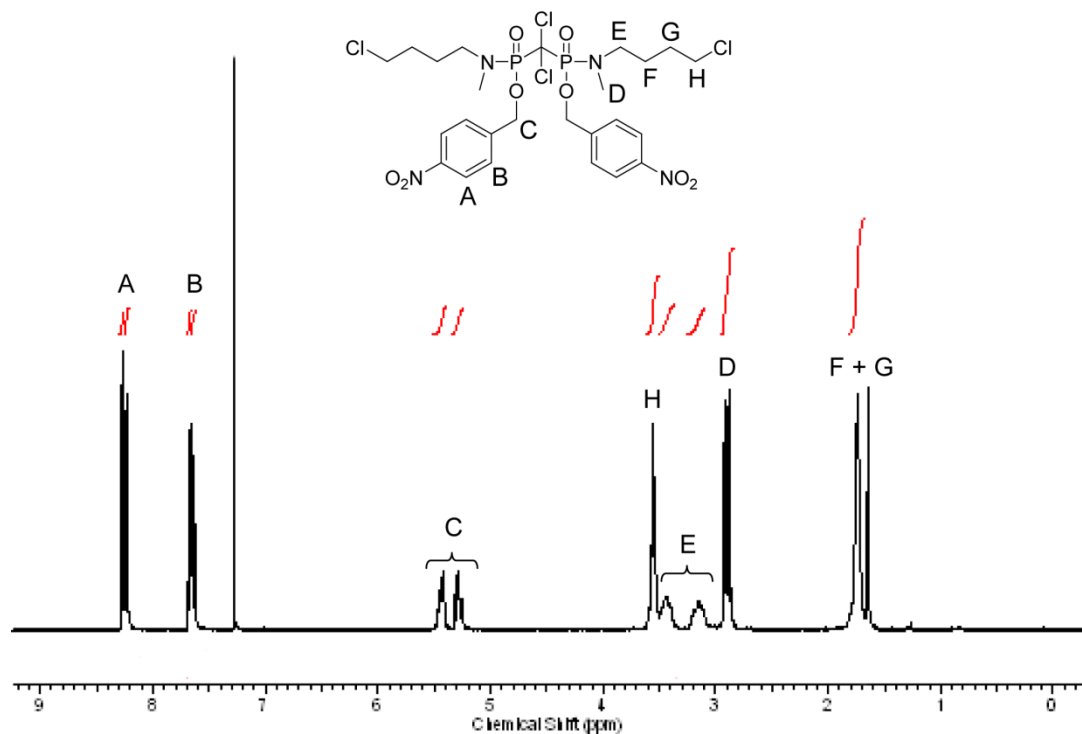

**Figure S4.**  $^1\text{H}$  NMR of clodronate prodrug **15** acquired in  $\text{CDCl}_3$  on a 400 MHz Bruker NMR. Chemical shifts are reported in the accompanying publication (Experimental Procedures).

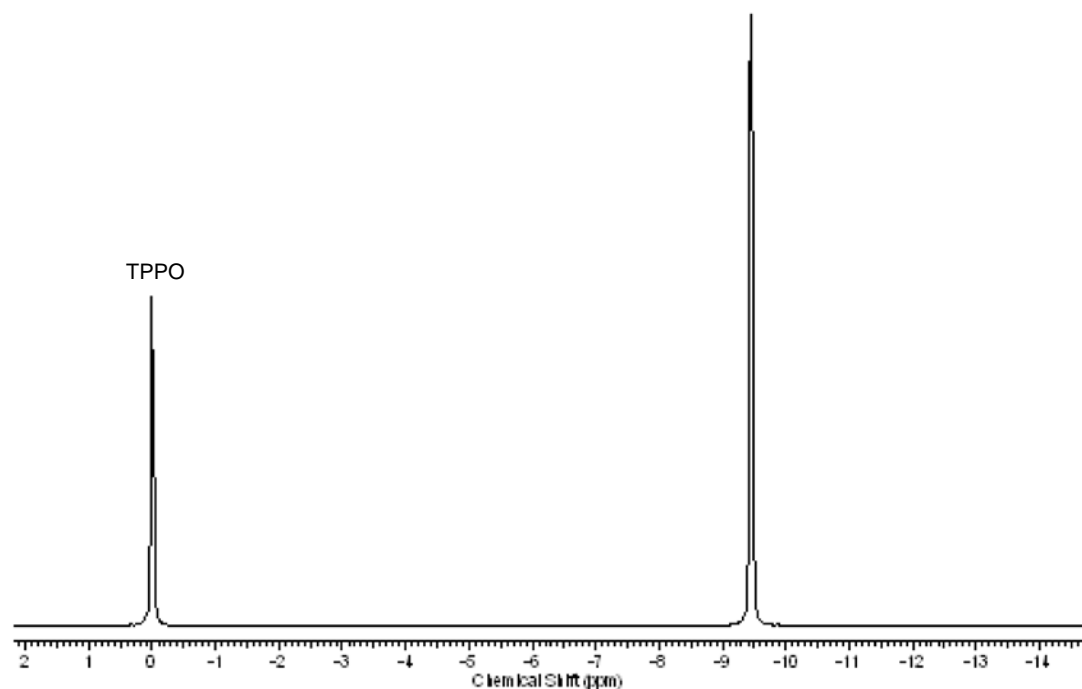

**Figure S5.**  $^{31}\text{P}$  NMR of clodronate prodrug **15** acquired in  $\text{CDCl}_3$  on a 400 MHz Bruker NMR, using TPPO as an external standard. Chemical shift is reported in the accompanying publication (Experimental Procedures).

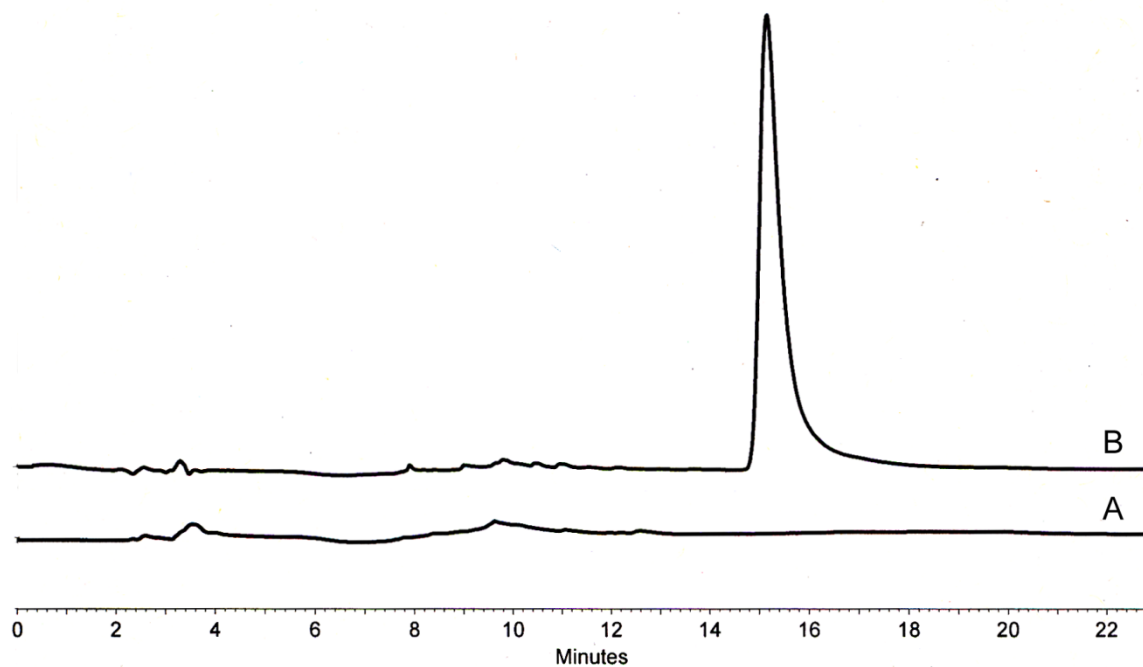

**Figure S6.** Purity of bisphosphonate prodrug **15** is > 95% as determined by reversed-phase HPLC (Altima C<sub>18</sub> column, 250 mm × 4.6 mm I.D.). Method: 5:95 water/acetonitrile to 75% acetonitrile over 5 min, 75% acetonitrile for 5 min, 75-100% acetonitrile over 5 min, then 100% acetonitrile for 5 min. Retention time = 15.2 min. Detected at  $\lambda_{\text{max}}$  of 270 nm. Minor peaks observed in the chromatogram of **15** (B) are artifacts detected in the background chromatogram (A).

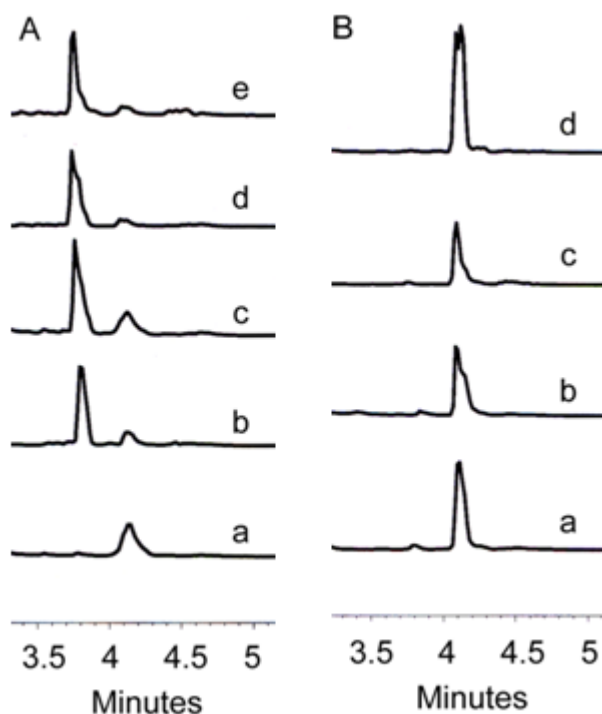

**Figure S7.** Prodrugs **14** and **15** are stable in 1640 RPMI media over 72 at 37°C. Stability was monitored by reversed-phase HPLC, using a C<sub>18</sub> Rocket<sup>TM</sup> column (monitored at  $\lambda_{\text{max}}$  of 270 nm). Method: 5-100% acetonitrile over 3 min, 100% acetonitrile for 5 min. Retention time of **14** = 3.7 min. Retention time of **15** = 4.1 min. **Figure 4A):** Stability of prodrug **14** in media over 72 hours. a) media only at 24 h; b) **14** in media, 0 h; c) **14** in media, 24 h; d) **14** in media, 48 h; e) **14** in media, 72h. **Figure 4B):** Stability of prodrug **15** in media over 72 hours. A small decrease in the peak area of **15** (~20%) was observed by 48 hours, but without concomitant appearance of a new species in the chromatogram. A thin film accumulating on the vial from these samples was confirmed to be pure prodrug **15**, indicating **15** is stable over several days in media at 37°C. a) **15** in media, 0 h; b) **15** in media, 48 h; c) **15** in media, 72 h; d) film dissolved in DMSO and re-subjected to HPLC analysis.

**Chemical conversion of prodrug 14 to derivatized bisphosphonate 19.** Tetra-silyl bisphosphonate **18** was detected in A549 cells treated with prodrug **14**. Here the possibility that the prodrug itself is converted to **18** under the derivatization conditions was considered. In order to rule this out as a possible explanation for the observed derivatized bisphosphonate **18** in prodrug-treated cells, A549 cell lysate (prepared as described in Experimental Protocols) was spiked with prodrug **14** (1920 ng/mL), and the lysate was immediately subjected to derivatization conditions. Under these conditions, minimal conversion to **18** was observed, confirming that **18** observed in prodrug-treated cells is largely a result of intracellular prodrug activation and release of bisphosphonate **1**.

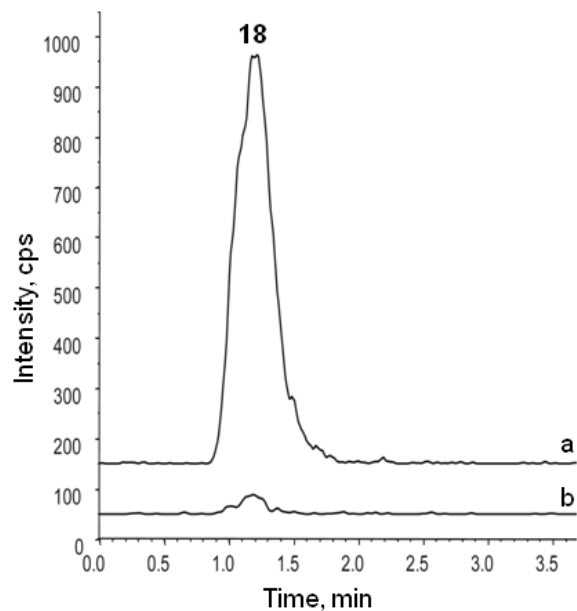

**Figure S8.** Prodrug **14** undergoes minimal conversion to derivatized bisphosphonate **18** in the presence of MTBSTFA. a) tetra-silyl bisphosphonate **18** detected in A549 cells treated with prodrug **14**. The prodrug concentration in this sample was determined to be 474 ng/mL (169.3 ng/10<sup>4</sup> cells, Figure 4A); b) tetra-silyl bisphosphonate **18** detected in A549 cell lysate spiked with prodrug **14** immediately prior to derivatization with MTBSTFA. The prodrug concentration in this sample was 1920 ng/mL.
